# Supplementary material for: BNT162b2 COVID-19 Vaccine Safety among Healthcare Workers of a Tertiary Hospital in Italy
Source: MDPI journal article supplement (doi:10.3390/vaccines11020477), 2023-02-17
Supplement: s1 [file s1]

**Table S1.** Table showing the proportion of variance explained by each individual principal components (PCs), the cumulative proportion of variance explained by PC1+PC2 and PC1+PC2+PC3, and the contribution that each reported adverse effect has in defining each PC (i.e. PCs loadings).

|                        | PC1    | PC2    | PC3    | PC4    | PC5    | PC6    | PC7    | PC8    | PC9    | PC10   | PC11   | PC12   | PC13   | PC14   | PC15   | PC16   | PC17   | PC18   | PC19   | PC20   | PC21   | PC22   | PC23   | PC24   | PC25   | PC26   | PC27   | PC28   |
|------------------------|--------|--------|--------|--------|--------|--------|--------|--------|--------|--------|--------|--------|--------|--------|--------|--------|--------|--------|--------|--------|--------|--------|--------|--------|--------|--------|--------|--------|
| Standard deviation     | 0.7384 | 0.5051 | 0.4262 | 0.4064 | 0.3820 | 0.3696 | 0.3399 | 0.3208 | 0.3067 | 0.2827 | 0.2461 | 0.0493 | 0.0471 | 0.0404 | 0.0385 | 0.0378 | 0.0325 | 0.0287 | 0.0286 | 0.0286 | 0.0273 | 0.0243 | 0.0238 | 0.0203 | 0.0203 | 0.0202 | 0.0201 | 0.0114 |
| Proportion of Variance | 0.2871 | 0.1344 | 0.0957 | 0.0870 | 0.0768 | 0.0719 | 0.0608 | 0.0542 | 0.0495 | 0.0421 | 0.0319 | 0.0013 | 0.0012 | 0.0009 | 0.0008 | 0.0008 | 0.0006 | 0.0004 | 0.0004 | 0.0004 | 0.0004 | 0.0003 | 0.0003 | 0.0002 | 0.0002 | 0.0002 | 0.0002 | 0.0001 |
| Cumulative Proportion  | 0.2871 | 0.4215 | 0.5172 | 0.6041 | 0.6809 | 0.7529 | 0.8137 | 0.8679 | 0.9174 | 0.9595 | 0.9914 | 0.9927 | 0.9938 | 0.9947 | 0.9955 | 0.9962 | 0.9968 | 0.9972 | 0.9976 | 0.9981 | 0.9985 | 0.9988 | 0.9991 | 0.9993 | 0.9995 | 0.9997 | 0.9999 | 1.0000 |
| Gastroint              | -0.003 | 0.001  | -0.003 | 0.001  | -0.003 | 0.000  | -0.004 | 0.002  | -0.005 | 0.002  | -0.006 | 0.009  | -0.005 | -0.815 | 0.025  | 0.005  | 0.008  | 0.000  | 0.004  | 0.002  | 0.001  | 0.004  | 0.000  | 0.307  | 0.286  | -0.120 | -0.381 | -0.002 |
| Arthralgia             | -0.002 | 0.000  | -0.003 | 0.000  | 0.002  | 0.001  | -0.001 | 0.000  | 0.002  | 0.003  | 0.002  | 0.006  | -0.008 | 0.027  | 0.850  | 0.047  | 0.008  | 0.004  | 0.000  | 0.001  | -0.005 | 0.000  | 0.524  | -0.001 | 0.001  | -0.002 | -0.001 | 0.000  |
| Asthenia               | 0.001  | 0.003  | 0.002  | 0.000  | 0.002  | 0.001  | 0.000  | 0.003  | -0.001 | -0.003 | 0.002  | 0.016  | 0.383  | -0.009 | 0.012  | 0.004  | -0.923 | 0.001  | -0.005 | 0.003  | -0.002 | 0.001  | 0.001  | 0.001  | 0.001  | 0.001  | -0.002 | 0.000  |
| Chills                 | -0.301 | 0.219  | 0.054  | 0.133  | 0.649  | -0.034 | 0.285  | 0.004  | 0.569  | 0.106  | 0.049  | -0.002 | -0.003 | -0.006 | -0.005 | 0.000  | 0.000  | -0.001 | 0.003  | -0.002 | 0.004  | 0.000  | 0.002  | -0.001 | 0.001  | 0.000  | -0.002 | 0.000  |
| Photophobia            | 0.000  | -0.001 | 0.001  | 0.001  | 0.000  | 0.000  | -0.002 | -0.003 | -0.001 | 0.000  | 0.000  | 0.001  | -0.001 | 0.002  | -0.002 | -0.002 | -0.003 | 0.787  | 0.615  | -0.054 | -0.002 | 0.005  | -0.003 | -0.002 | 0.003  | 0.003  | 0.003  | 0.000  |
| Headache               | -0.288 | 0.006  | -0.789 | -0.361 | -0.041 | 0.328  | -0.096 | 0.165  | 0.099  | 0.071  | 0.058  | 0.004  | -0.001 | 0.003  | -0.004 | -0.002 | -0.002 | 0.002  | 0.000  | -0.003 | 0.000  | 0.002  | -0.002 | 0.000  | 0.000  | 0.002  | 0.001  | -0.001 |
| Sinus_congestion       | -0.001 | 0.000  | -0.002 | 0.003  | 0.003  | 0.000  | 0.000  | -0.002 | 0.002  | 0.002  | 0.001  | 0.002  | -0.005 | 0.015  | 0.523  | 0.029  | 0.004  | -0.002 | 0.001  | 0.006  | 0.003  | -0.004 | -0.851 | 0.000  | 0.000  | 0.001  | 0.002  | -0.001 |
| Localized_pain         | -0.429 | -0.182 | -0.042 | 0.750  | -0.349 | 0.288  | -0.029 | -0.048 | 0.100  | 0.006  | 0.011  | 0.004  | -0.002 | 0.002  | -0.002 | -0.001 | -0.003 | 0.000  | -0.001 | 0.000  | 0.000  | 0.000  | 0.001  | 0.001  | 0.001  | 0.000  | 0.002  | 0.001  |
| Diarrhea               | -0.001 | 0.000  | 0.001  | 0.000  | -0.003 | 0.005  | -0.003 | 0.004  | 0.004  | 0.003  | 0.002  | -0.817 | 0.037  | -0.013 | 0.033  | -0.508 | 0.000  | -0.006 | 0.007  | 0.000  | -0.240 | 0.110  | 0.000  | -0.001 | -0.001 | -0.001 | 0.003  | -0.051 |
| Inj_site_pain          | 0.251  | -0.722 | -0.294 | 0.235  | 0.464  | -0.166 | -0.153 | -0.011 | -0.070 | -0.054 | 0.019  | -0.001 | 0.002  | -0.001 | -0.002 | -0.003 | -0.001 | 0.000  | -0.002 | 0.003  | 0.000  | 0.000  | 0.002  | -0.001 | -0.001 | 0.000  | -0.001 | 0.000  |
| Inj_site_red           | 0.000  | 0.001  | -0.001 | 0.001  | -0.001 | 0.003  | 0.001  | 0.001  | -0.002 | 0.001  | 0.000  | 0.001  | -0.001 | 0.002  | -0.001 | 0.000  | 0.001  | 0.001  | 0.000  | -0.002 | -0.002 | 0.007  | -0.003 | -0.747 | 0.063  | -0.533 | -0.393 | -0.001 |
| Pyrexia                | -0.259 | 0.187  | -0.084 | 0.152  | 0.327  | 0.051  | 0.349  | 0.131  | -0.784 | 0.039  | -0.058 | -0.004 | 0.004  | 0.002  | 0.000  | 0.000  | 0.004  | 0.001  | 0.000  | 0.003  | -0.003 | 0.001  | 0.001  | 0.000  | -0.002 | 0.003  | 0.003  | 0.000  |
| Paresthesia            | -0.001 | 0.003  | -0.001 | 0.003  | -0.002 | 0.000  | -0.003 | 0.000  | 0.006  | 0.004  | 0.003  | 0.044  | 0.922  | -0.003 | 0.005  | -0.003 | 0.384  | 0.002  | 0.001  | 0.002  | -0.002 | -0.001 | -0.001 | -0.002 | -0.001 | 0.001  | 0.000  | 0.000  |
| Insomnia               | -0.179 | 0.198  | -0.341 | 0.158  | -0.204 | -0.861 | -0.042 | -0.008 | 0.014  | 0.054  | 0.019  | -0.003 | -0.001 | 0.003  | -0.001 | 0.000  | -0.002 | 0.001  | 0.001  | 0.002  | -0.002 | 0.001  | 0.001  | 0.000  | 0.001  | -0.002 | 0.000  | 0.000  |
| Hypersensitivity       | -0.024 | 0.011  | -0.073 | -0.002 | 0.018  | -0.001 | 0.010  | -0.008 | 0.089  | -0.211 | -0.970 | -0.001 | 0.003  | 0.003  | 0.003  | 0.000  | 0.000  | 0.002  | -0.001 | -0.005 | -0.005 | 0.004  | 0.000  | -0.001 | 0.000  | -0.004 | 0.006  | 0.002  |
| Hypoesthesia           | 0.000  | -0.001 | 0.001  | 0.001  | -0.001 | 0.000  | -0.001 | 0.000  | 0.000  | 0.000  | 0.000  | -0.091 | 0.005  | 0.000  | -0.013 | 0.270  | 0.002  | 0.001  | -0.005 | 0.006  | 0.159  | 0.574  | 0.000  | 0.000  | 0.002  | 0.000  | 0.011  | -0.750 |
| Lymphadenopathy        | -0.067 | 0.083  | -0.044 | 0.007  | 0.032  | -0.015 | 0.052  | 0.072  | 0.032  | -0.964 | 0.219  | -0.003 | 0.001  | -0.003 | 0.003  | 0.000  | 0.005  | 0.001  | -0.001 | -0.003 | 0.000  | -0.001 | 0.000  | -0.001 | 0.000  | 0.000  | 0.000  | -0.001 |
| Malaise                | -0.505 | -0.092 | 0.344  | -0.167 | 0.173  | -0.097 | -0.660 | 0.324  | -0.097 | -0.003 | -0.028 | 0.004  | -0.001 | 0.003  | 0.000  | 0.000  | 0.001  | 0.000  | -0.001 | 0.001  | -0.003 | -0.001 | -0.001 | -0.001 | -0.001 | -0.001 | -0.002 | 0.001  |
| Nausea                 | -0.163 | 0.137  | -0.067 | -0.062 | 0.162  | 0.060  | -0.301 | -0.897 | -0.134 | -0.054 | 0.017  | -0.004 | 0.001  | 0.002  | -0.002 | 0.000  | -0.002 | -0.002 | -0.003 | -0.001 | 0.000  | -0.001 | 0.001  | 0.002  | -0.002 | -0.001 | -0.004 | -0.001 |
| Presyncope             | 0.000  | 0.001  | 0.000  | 0.001  | -0.002 | -0.001 | -0.002 | 0.001  | 0.001  | 0.000  | -0.007 | 0.001  | -0.001 | 0.004  | 0.001  | 0.001  | -0.002 | 0.001  | -0.002 | -0.004 | -0.010 | 0.009  | 0.000  | -0.253 | -0.168 | 0.759  | -0.576 | -0.005 |
| Pustola                | 0.000  | 0.001  | 0.001  | 0.000  | 0.001  | 0.000  | 0.001  | 0.000  | 0.003  | 0.001  | 0.000  | 0.000  | -0.002 | -0.003 | -0.002 | 0.002  | 0.003  | 0.423  | -0.522 | 0.219  | -0.031 | 0.000  | -0.001 | 0.000  | -0.002 | -0.001 | 0.001  | 0.000  |
| Hyperhidrosis          | -0.001 | 0.000  | -0.002 | 0.001  | -0.002 | 0.001  | -0.003 | 0.004  | -0.002 | 0.001  | -0.006 | -0.321 | 0.016  | 0.004  | -0.004 | 0.108  | 0.000  | 0.021  | -0.018 | 0.005  | 0.633  | -0.638 | 0.006  | 0.000  | 0.002  | 0.002  | -0.018 | -0.276 |
| Fatigue                | -0.439 | -0.538 | 0.182  | -0.394 | -0.185 | -0.155 | 0.482  | -0.195 | 0.014  | -0.019 | 0.000  | -0.003 | 0.004  | -0.001 | 0.001  | -0.001 | -0.001 | 0.000  | 0.000  | 0.001  | 0.001  | -0.001 | 0.000  | 0.000  | 0.000  | 0.000  | 0.000  | 0.000  |
| Sweats                 | 0.000  | -0.001 | -0.001 | 0.001  | 0.001  | 0.001  | 0.002  | 0.000  | 0.003  | 0.001  | 0.001  | -0.115 | 0.005  | -0.003 | -0.027 | 0.453  | 0.002  | -0.018 | 0.024  | -0.014 | -0.705 | -0.435 | -0.002 | 0.000  | -0.002 | -0.005 | 0.002  | -0.305 |
| Tachycardia            | 0.000  | -0.003 | -0.001 | 0.000  | -0.001 | 0.002  | -0.003 | 0.002  | 0.001  | 0.001  | 0.001  | -0.454 | 0.023  | -0.001 | -0.033 | 0.670  | 0.004  | 0.003  | -0.002 | 0.004  | 0.129  | 0.248  | 0.000  | 0.000  | 0.001  | 0.002  | -0.001 | 0.515  |
| Cough                  | -0.001 | 0.002  | -0.001 | -0.002 | -0.001 | 0.003  | -0.001 | -0.001 | 0.004  | -0.004 | -0.004 | 0.002  | -0.003 | 0.004  | -0.004 | 0.001  | 0.000  | -0.151 | 0.276  | 0.949  | -0.001 | -0.007 | 0.006  | -0.003 | -0.001 | 0.002  | -0.003 | 0.000  |
| Aphtha                 | -0.001 | 0.000  | -0.001 | -0.001 | -0.002 | -0.001 | -0.002 | -0.002 | 0.000  | 0.001  | 0.001  | 0.004  | -0.003 | -0.409 | 0.013  | 0.003  | 0.002  | -0.002 | 0.002  | 0.001  | 0.008  | -0.008 | 0.002  | -0.309 | -0.284 | 0.121  | 0.376  | 0.001  |
| Vomiting               | 0.000  | 0.001  | 0.001  | 0.000  | 0.001  | 0.000  | 0.001  | 0.000  | 0.003  | 0.001  | 0.000  | 0.000  | -0.002 | -0.003 | -0.002 | 0.002  | 0.003  | 0.423  | -0.522 | 0.219  | -0.031 | 0.000  | -0.001 | 0.000  | -0.002 | -0.001 | 0.001  | 0.000  |
| Inj_site_swel          | -0.001 | 0.000  | -0.001 | -0.001 | -0.002 | -0.001 | -0.002 | -0.002 | 0.000  | 0.001  | 0.001  | 0.004  | -0.003 | -0.409 | 0.013  | 0.003  | 0.002  | -0.002 | 0.002  | 0.001  | 0.008  | -0.008 | 0.002  | -0.309 | -0.284 | 0.121  | 0.376  | 0.001  |
| Myalgia                | 0.000  | -0.001 | 0.001  | -0.001 | 0.001  | -0.001 | -0.002 | -0.003 | -0.001 | 0.000  | 0.000  | 0.000  | 0.000  | 0.001  | 0.000  | 0.000  | 0.000  | -0.003 | -0.005 | 0.001  | -0.001 | -0.006 | 0.001  | -0.304 | 0.852  | 0.310  | 0.294  | 0.001  |

**Table S2.** Descriptive analysis of reported adverse effects absolute frequency across the three clusters.

|                  | Cluster 1 | Cluster 2 | Cluster 3 |
|------------------|-----------|-----------|-----------|
| Gastroint        | 3         | 0         | 0         |
| Arthralgia       | 2         | 0         | 1         |
| Asthenia         | 0         | 2         | 1         |
| Chills           | 329       | 145       | 43        |
| Photophobia      | 1         | 0         | 1         |
| Headache         | 380       | 177       | 115       |
| Sinus congestion | 1         | 0         | 1         |
| Localized pain   | 591       | 149       | 153       |
| Diarrhea         | 2         | 2         | 1         |
| Inj site pain    | 463       | 0         | 1089      |
| Inj site red     | 0         | 1         | 0         |
| Pyrexia          | 267       | 119       | 24        |
| Paresthesia      | 1         | 2         | 2         |
| Insomnia         | 241       | 157       | 89        |
| Hypersensitivity | 69        | 43        | 51        |
| Hypoesthesia     | 1         | 0         | 0         |
| Lymphadenopathy  | 99        | 81        | 41        |
| Malaise          | 629       | 208       | 80        |
| Nausea           | 183       | 125       | 31        |
| Presyncope       | 0         | 1         | 0         |
| Pustola          | 0         | 1         | 0         |
| Hyperhidrosis    | 2         | 0         | 0         |
| Fatigue          | 673       | 203       | 295       |
| Sweats           | 1         | 0         | 1         |
| Tachycardia      | 2         | 0         | 1         |
| Cough            | 1         | 1         | 0         |
| Aphtha           | 1         | 0         | 0         |
| Vomiting         | 0         | 1         | 0         |
| Inj site swel    | 1         | 0         | 0         |
| Myalgia          | 1         | 0         | 0         |
