# Supplementary material for: BNT162b2 COVID-19 Vaccine Safety among Healthcare Workers of a Tertiary Hospital in Italy
Source: MDPI journal article supplement (doi:10.3390/vaccines11020477), 2023-02-17
Supplement: s1 [file s1]

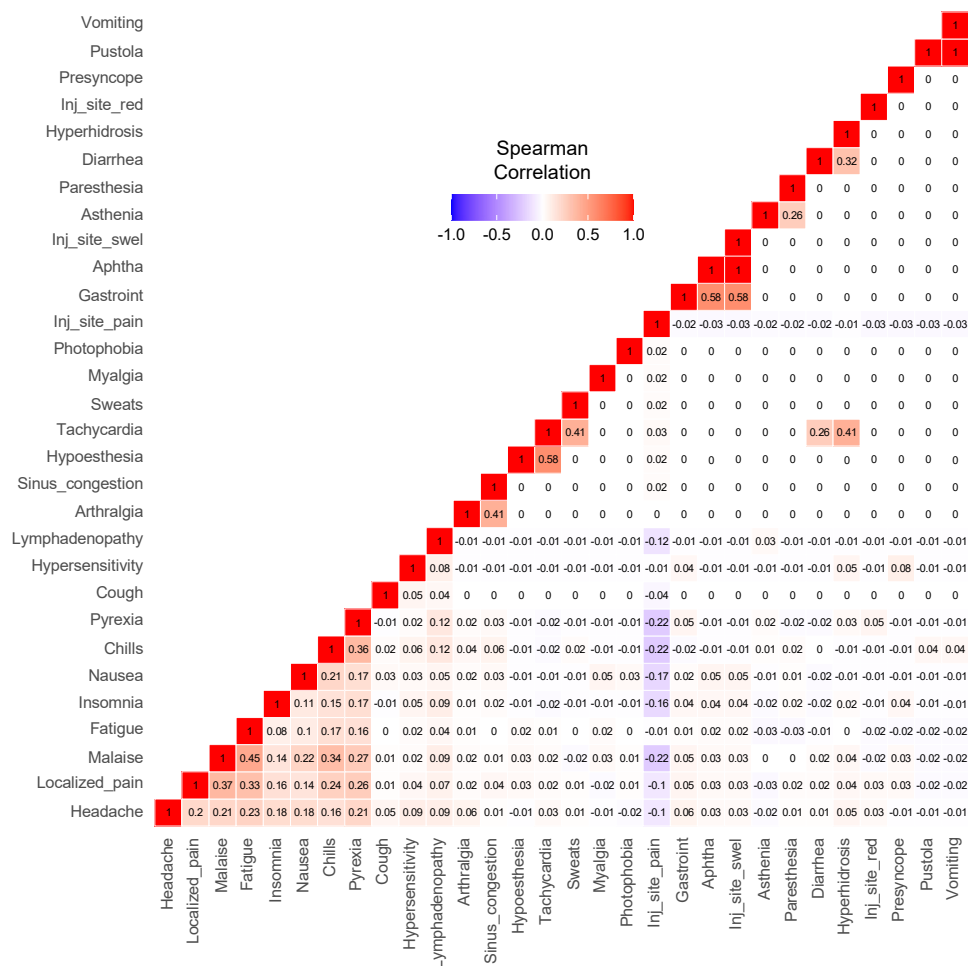

**Figure S1.** Spearman's correlation matrix of reported adverse reactions. Correlation coefficients ( $r_s$ ) are included in cells and graphically summarized as a heatmap, with colours ranging from blue for negative values to red for positive values. There are two cases of  $r_s=1$  (injection site swelling ~ aphtha, vomiting ~ pustola) since these pairs of adverse effects were reported only once together.

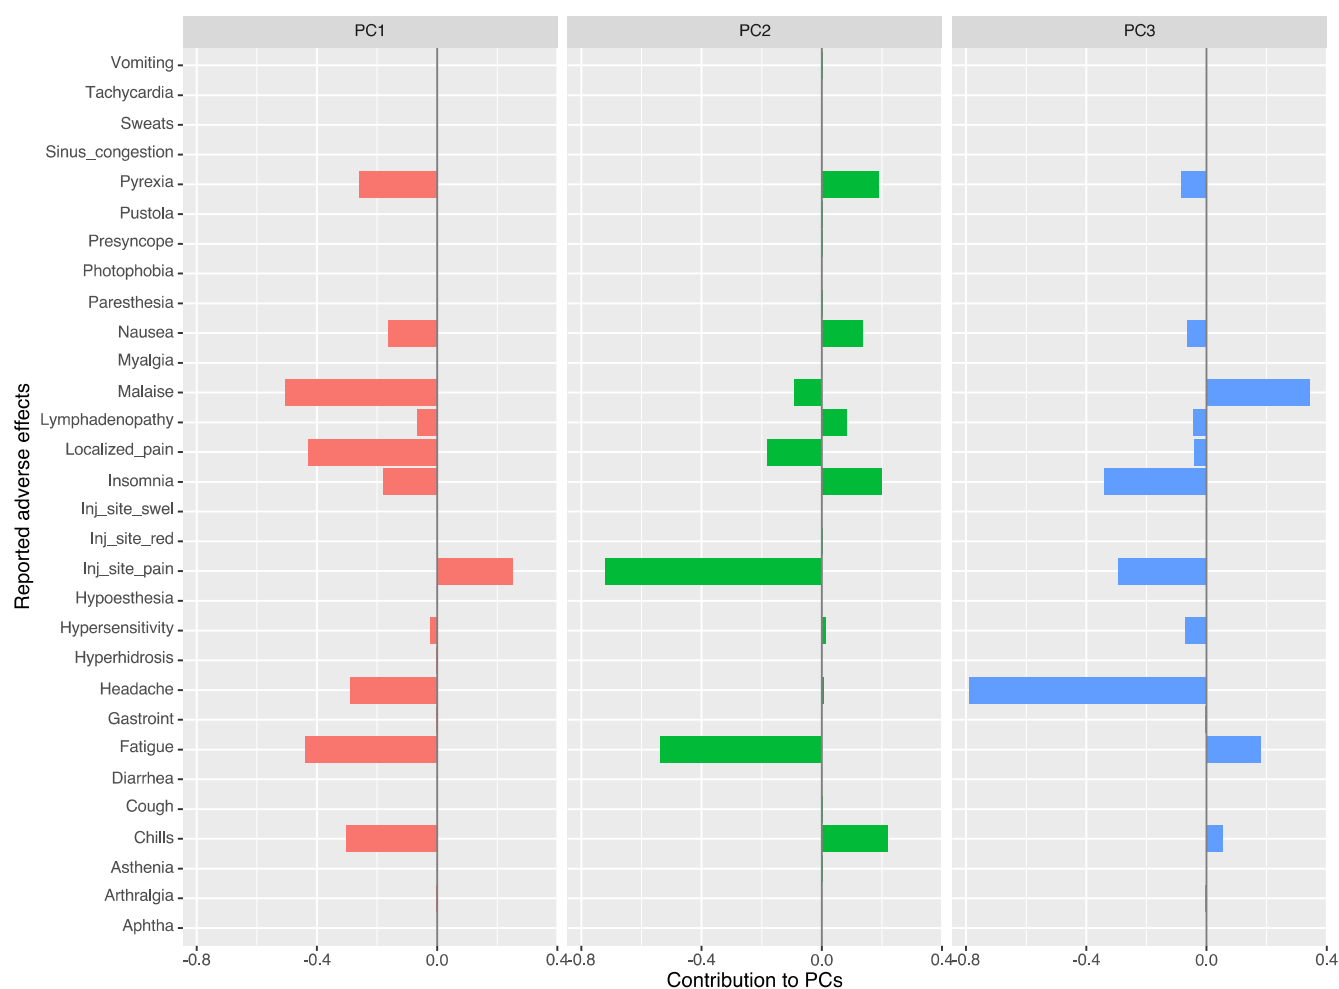

**Figure S2.** Bar-plot representation of the individual contribution of each reported adverse effects on the definition of the three main principal components, which together explain 51.7% of the total variation.

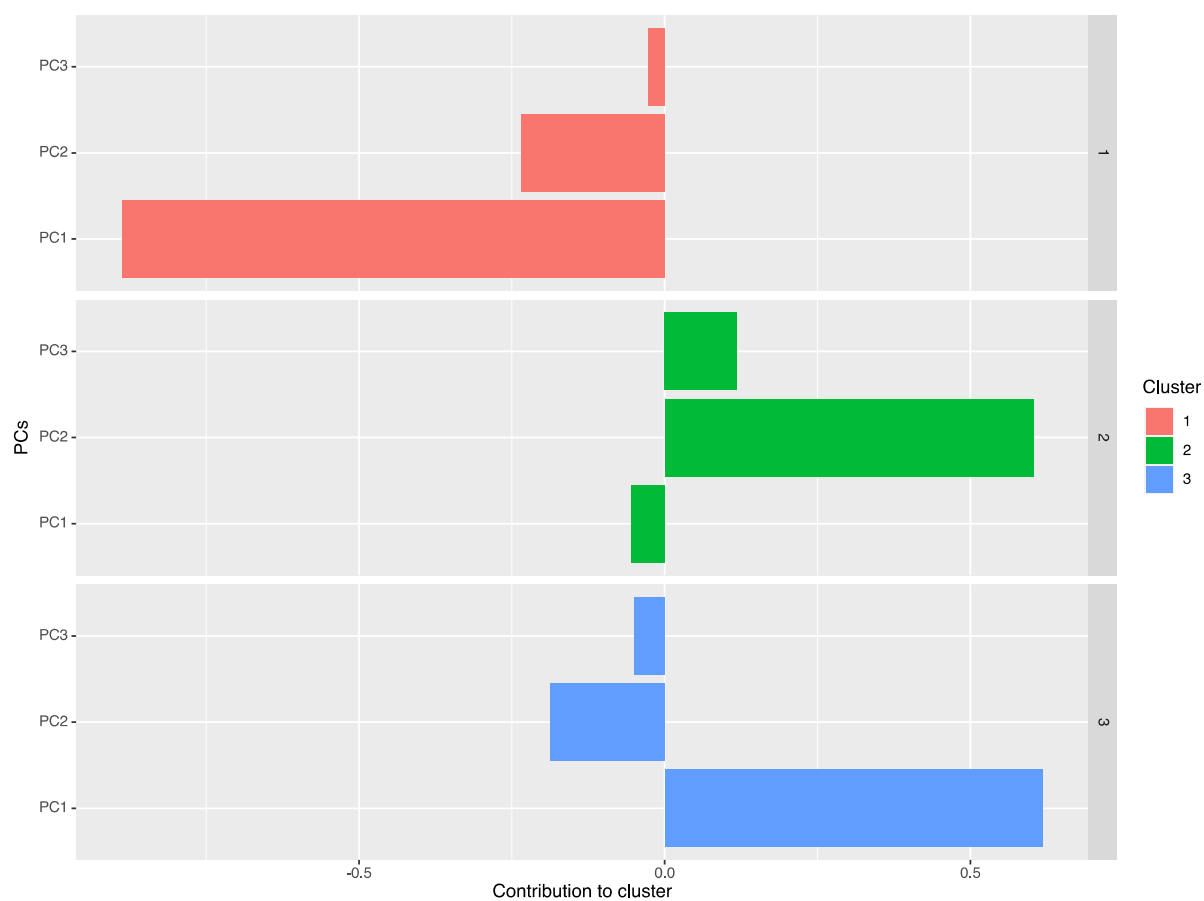

**Figure S3.** Bar-plot representation of the individual contribution of each identified principal component on the definition of the three clusters of reports identified through a k-means cluster analysis of principal components.
